# Supplementary material for: Association between muscle strength and health-related quality of life in a Chinese rural elderly population: a cross-sectional study
Source: PubMed Central journal article supplement — BMJ Open. 2020 Jan 9;10(1):e026560. doi: 10.1136/bmjopen-2018-026560 (PMC6955502; doi:10.1136/bmjopen-2018-026560), 2020-01-09
Supplement: bmjopen-2018-026560supp001.pdf [file bmjopen-2018-026560supp001.pdf]

Table S1. Association between handgrip strength/TUGT time and EQ-5D-VAS findings in the different age groups

|                   | Model A |        |        |                  |        | Model B |        |        |                  |        | Model C |        |        |                  |        | Model D |        |        |                  |        |
|-------------------|---------|--------|--------|------------------|--------|---------|--------|--------|------------------|--------|---------|--------|--------|------------------|--------|---------|--------|--------|------------------|--------|
|                   | $\beta$ | 95% CI |        | Standard $\beta$ | P      | $\beta$ | 95% CI |        | Standard $\beta$ | P      | $\beta$ | 95% CI |        | Standard $\beta$ | P      | $\beta$ | 95% CI |        | Standard $\beta$ | P      |
| 60-79 years       |         |        |        |                  |        |         |        |        |                  |        |         |        |        |                  |        |         |        |        |                  |        |
| Handgrip strength |         |        |        |                  |        |         |        |        |                  |        |         |        |        |                  |        |         |        |        |                  |        |
| Per unit (kg)     | 0.178   | 0.115  | 0.241  | 0.132            | <0.001 | 0.106   | 0.032  | 0.181  | 0.079            | 0.005  | 0.094   | 0.021  | 0.168  | 0.070            | 0.012  | 0.065   | -0.007 | 0.137  | 0.048            | 0.078  |
| Per SD            | 2.027   | 1.284  | 2.771  | 0.128            | <0.001 | 1.204   | 0.344  | 2.064  | 0.076            | 0.006  | 1.074   | 0.225  | 1.923  | 0.068            | 0.013  | 0.788   | -0.044 | 1.621  | 0.050            | 0.063  |
| Per 10%           | 0.775   | 0.510  | 1.041  | 0.137            | <0.001 | 0.483   | 0.173  | 0.793  | 0.085            | 0.002  | 0.431   | 0.124  | 0.737  | 0.076            | 0.006  | 0.301   | 0.000  | 0.602  | 0.053            | 0.050  |
| TUGT time         |         |        |        |                  |        |         |        |        |                  |        |         |        |        |                  |        |         |        |        |                  |        |
| Per unit (s)      | -0.268  | -0.359 | -0.178 | -0.133           | <0.001 | -0.221  | -0.313 | -0.129 | -0.110           | <0.001 | -0.206  | -0.297 | -0.115 | -0.103           | <0.001 | -0.153  | -0.243 | -0.063 | -0.076           | 0.001  |
| Per SD            | -3.035  | -3.879 | -2.191 | -0.162           | <0.001 | -2.620  | -3.469 | -1.770 | -0.140           | <0.001 | -2.455  | -3.289 | -1.601 | -0.130           | <0.001 | -1.942  | -2.782 | -1.102 | -0.104           | <0.001 |
| Per 10%           | -1.121  | -1.351 | -0.891 | -0.217           | <0.001 | -0.965  | -1.206 | -0.724 | -0.187           | <0.001 | -0.895  | -1.136 | -0.653 | -0.173           | <0.001 | -0.760  | -1.000 | -0.521 | -0.147           | <0.001 |
| $\geq 80$ years   |         |        |        |                  |        |         |        |        |                  |        |         |        |        |                  |        |         |        |        |                  |        |
| Handgrip strength |         |        |        |                  |        |         |        |        |                  |        |         |        |        |                  |        |         |        |        |                  |        |
| Per unit (kg)     | 0.347   | 0.119  | 0.575  | 0.198            | 0.003  | 0.366   | 0.102  | 0.630  | 0.208            | 0.007  | 0.340   | 0.082  | 0.598  | 0.194            | 0.010  | 0.322   | 0.063  | 0.582  | 0.184            | 0.015  |
| Per SD            | 4.406   | 1.739  | 7.073  | 0.214            | 0.001  | 4.702   | 1.658  | 7.746  | 0.228            | 0.003  | 4.159   | 1.170  | 7.149  | 0.202            | 0.007  | 3.876   | 0.862  | 6.890  | 0.188            | 0.012  |
| Per 10%           | 1.052   | 0.219  | 1.884  | 0.165            | 0.014  | 1.086   | 0.107  | 2.066  | 0.171            | 0.030  | 1.014   | 0.060  | 1.968  | 0.159            | 0.037  | 0.372   | 0.084  | 0.659  | 0.066            | 0.011  |
| TUGT time         |         |        |        |                  |        |         |        |        |                  |        |         |        |        |                  |        |         |        |        |                  |        |
| Per unit (s)      | -0.382  | -0.612 | -0.152 | -0.211           | 0.001  | -0.345  | -0.582 | -0.109 | -0.191           | 0.004  | -0.258  | -0.502 | -0.014 | -0.142           | 0.038  | -0.269  | -0.516 | -0.022 | -0.148           | 0.033  |
| Per SD            | -3.714  | -5.849 | -1.580 | -0.221           | 0.001  | -3.437  | -5.634 | -1.240 | -0.204           | 0.002  | -2.545  | -4.850 | -0.240 | -0.151           | 0.031  | -2.655  | -4.977 | -0.354 | -0.158           | 0.024  |
| Per 10%           | -2.079  | -2.824 | -1.334 | -0.341           | <0.001 | -2.059  | -2.854 | -1.264 | -0.338           | <0.001 | -1.793  | -2.611 | -0.976 | -0.294           | <0.001 | -1.736  | -2.556 | -0.916 | -0.285           | <0.001 |

Model A: Crude model

Model B: Adjusted for age, sex, nationality, educational level, occupation, and marital status

Model C: Adjusted for age, sex, nationality, educational level, occupation, marital status, smoking status, drinking status, BMI, and physical activity level

Model D: Adjusted for age, sex, nationality, educational level, occupation, marital status, smoking status, drinking status, BMI, physical activity level, CHD, stroke, and T2DM

TUGT, Time up and go test; CHD, coronary heart disease; T2DM, type 2 diabetes mellitus

Table S2. Association between handgrip strength/TUGT time and EQ-5D-VAS findings in the participants with and without chronic diseases

|                              | Model A |        |        |                  |        | Model B |        |        |                  |        | Model C |        |        |                  |        |
|------------------------------|---------|--------|--------|------------------|--------|---------|--------|--------|------------------|--------|---------|--------|--------|------------------|--------|
|                              | $\beta$ | 95% CI |        | Standard $\beta$ | P      | $\beta$ | 95% CI |        | Standard $\beta$ | P      | $\beta$ | 95% CI |        | Standard $\beta$ | P      |
| Without chronic diseases     |         | lower  | upper  |                  |        |         | lower  | upper  |                  |        |         | lower  | upper  |                  |        |
| <b>Handgrip strength</b>     |         |        |        |                  |        |         |        |        |                  |        |         |        |        |                  |        |
| Per unit (kg)                | 0.165   | 0.091  | 0.240  | 0.127            | <0.001 | 0.075   | -0.015 | 0.165  | 0.057            | 0.104  | 0.065   | -0.024 | 0.153  | 0.050            | 0.153  |
| Per SD                       | 2.054   | 1.178  | 2.930  | 0.134            | <0.001 | 1.081   | 0.047  | 2.116  | 0.071            | 0.040  | 0.993   | -0.025 | 2.011  | 0.065            | 0.056  |
| Per 10%                      | 0.738   | 0.420  | 1.055  | 0.133            | <0.001 | 0.367   | -0.013 | 0.748  | 0.066            | 0.058  | 0.334   | -0.041 | 0.708  | 0.060            | 0.081  |
| <b>TUGT time</b>             |         |        |        |                  |        |         |        |        |                  |        |         |        |        |                  |        |
| Per unit (s)                 | -0.264  | -0.380 | -0.147 | -0.126           | <0.001 | -0.193  | -0.311 | -0.074 | -0.092           | 0.001  | -0.184  | -0.301 | -0.066 | -0.088           | 0.002  |
| Per SD                       | -2.711  | -3.784 | -1.639 | -0.140           | <0.001 | -2.051  | -3.146 | -0.956 | -0.106           | <0.001 | -1.961  | -3.046 | -0.875 | -0.101           | <0.001 |
| Per 10%                      | -1.173  | -1.451 | -0.895 | -0.230           | <0.001 | -0.991  | -1.291 | -0.692 | -0.194           | <0.001 | -0.914  | -1.214 | -0.614 | -0.179           | <0.001 |
| <b>With chronic diseases</b> |         |        |        |                  |        |         |        |        |                  |        |         |        |        |                  |        |
| <b>Handgrip strength</b>     |         |        |        |                  |        |         |        |        |                  |        |         |        |        |                  |        |
| Per unit (kg)                | 0.193   | 0.096  | 0.290  | 0.138            | <0.001 | 0.167   | 0.051  | 0.282  | 0.119            | 0.005  | 0.154   | 0.040  | 0.268  | 0.110            | 0.008  |
| Per SD                       | 2.105   | 0.956  | 3.254  | 0.127            | <0.001 | 1.743   | 0.405  | 3.080  | 0.106            | 0.011  | 1.561   | 0.235  | 2.887  | 0.095            | 0.021  |
| Per 10%                      | 0.730   | 0.340  | 1.119  | 0.130            | <0.001 | 0.603   | 0.143  | 1.063  | 0.108            | 0.010  | 0.538   | 0.082  | 0.994  | 0.096            | 0.021  |
| <b>TUGT time</b>             |         |        |        |                  |        |         |        |        |                  |        |         |        |        |                  |        |
| Per unit (s)                 | -0.265  | -0.384 | -0.146 | -0.149           | <0.001 | -0.226  | -0.348 | -0.105 | -0.127           | <0.001 | -0.201  | -0.322 | -0.080 | -0.113           | 0.001  |
| Per SD                       | -3.145  | -4.248 | -2.042 | -0.189           | <0.001 | -2.823  | -3.956 | -1.689 | -0.170           | <0.001 | -2.516  | -3.653 | -1.379 | -0.151           | <0.001 |
| Per 10%                      | -1.072  | -1.408 | -0.736 | -0.210           | <0.001 | -0.981  | -1.341 | -0.620 | -0.192           | <0.001 | -0.908  | -1.268 | -0.548 | -0.178           | <0.001 |

Model A: Crude model

Model B: Adjusted for age, sex, nationality, educational level, occupation, and marital status

Model C: Adjusted for age, sex, nationality, educational level, occupation, marital status, smoking status, drinking status, BMI, and physical activity level

**Table S3. Association between handgrip strength/TUGT time and EQ-5D index scored 1 in the participants**

|                                   | Model A             | Model B             | Model C             | Model D             |
|-----------------------------------|---------------------|---------------------|---------------------|---------------------|
|                                   | OR (95% CI)         | OR (95% CI)         | OR (95% CI)         | OR (95% CI)         |
| <b>Handgrip strength</b>          |                     |                     |                     |                     |
| Per unit (kg)                     | 1.033 (1.022-1.043) | 1.020 (1.008-1.032) | 1.019 (1.006-1.031) | 1.017 (1.004-1.030) |
| Per SD                            | 1.482 (1.314-1.672) | 1.304 (1.135-1.498) | 1.287 (1.118-1.481) | 1.268 (1.101-1.46)  |
| Per 10%                           | 1.134 (1.090-1.180) | 1.079 (1.030-1.132) | 1.074 (1.024-1.127) | 1.067 (1.016-1.12)  |
| <b>Time up and go test (TUGT)</b> |                     |                     |                     |                     |
| Per unit (s)                      | 0.958 (0.947-0.970) | 0.965 (0.954-0.977) | 0.969 (0.957-0.981) | 0.971 (0.958-0.983) |
| Per SD                            | 0.620 (0.555-0.693) | 0.666 (0.594-0.746) | 0.693 (0.616-0.779) | 0.706 (0.626-0.795) |
| Per 10%                           | 0.818 (0.789-0.849) | 0.838 (0.806-0.871) | 0.852 (0.818-0.886) | 0.856 (0.822-0.891) |
| <b>60-79 years old</b>            |                     |                     |                     |                     |
| <b>Handgrip strength</b>          |                     |                     |                     |                     |
| Per unit (kg)                     | 1.028 (1.016-1.039) | 1.018 (1.005-1.031) | 1.017 (1.003-1.030) | 1.015 (1.001-1.028) |
| Per SD                            | 1.404 (1.234-1.597) | 1.273 (1.099-1.475) | 1.259 (1.085-1.462) | 1.237 (1.065-1.436) |
| Per 10%                           | 1.117 (1.070-1.166) | 1.076 (1.023-1.131) | 1.071 (1.018-1.128) | 1.063 (1.009-1.120) |
| <b>Time up and go test (TUGT)</b> |                     |                     |                     |                     |
| Per unit (s)                      | 0.963 (0.951-0.976) | 0.968 (0.955-0.981) | 0.970 (0.957-0.983) | 0.972 (0.959-0.986) |
| Per SD                            | 0.650 (0.575-0.735) | 0.678 (0.598-0.768) | 0.698 (0.614-0.793) | 0.713 (0.626-0.812) |
| Per 10%                           | 0.838 (0.805-0.871) | 0.851 (0.817-0.887) | 0.864 (0.829-0.901) | 0.869 (0.833-0.907) |
| <b>≥80 years old</b>              |                     |                     |                     |                     |
| <b>Handgrip strength</b>          |                     |                     |                     |                     |
| Per unit (kg)                     | 1.042 (1.008-1.076) | 1.037 (0.998-1.078) | 1.035 (0.995-1.076) | 1.033 (0.993-1.075) |
| Per SD                            | 1.646 (1.124-2.41)  | 1.613 (1.036-2.511) | 1.535 (0.980-2.402) | 1.508 (0.958-2.372) |
| Per 10%                           | 1.133 (1.009-1.271) | 1.115 (0.969-1.283) | 1.110 (0.962-1.280) | 1.100 (0.952-1.271) |
| <b>Time up and go test (TUGT)</b> |                     |                     |                     |                     |
| Per unit (s)                      | 0.949 (0.920-0.980) | 0.951 (0.920-0.983) | 0.958 (0.925-0.993) | 0.959 (0.925-0.995) |
| Per SD                            | 0.576 (0.431-0.769) | 0.578 (0.425-0.784) | 0.619 (0.446-0.859) | 0.623 (0.447-0.868) |
| Per 10%                           | 0.701 (0.608-0.808) | 0.692 (0.594-0.807) | 0.708 (0.604-0.831) | 0.710 (0.605-0.833) |
| <b>Without chronic diseases</b>   |                     |                     |                     |                     |
| <b>Handgrip strength</b>          |                     |                     |                     |                     |
| Per unit (kg)                     | 1.031 (1.017-1.045) | 1.014 (0.998-1.031) | 1.014 (0.997-1.031) |                     |
| Per SD                            | 1.503 (1.281-1.764) | 1.287 (1.069-1.549) | 1.284 (1.063-1.551) |                     |
| Per 10%                           | 1.137 (1.077-1.199) | 1.07 (1.003-1.141)  | 1.071 (1.003-1.143) |                     |
| <b>Time up and go test (TUGT)</b> |                     |                     |                     |                     |
| Per unit (s)                      | 0.959 (0.943-0.976) | 0.967 (0.950-0.984) | 0.969 (0.951-0.987) |                     |
| Per SD                            | 0.629 (0.537-0.737) | 0.679 (0.576-0.800) | 0.695 (0.587-0.824) |                     |
| Per 10%                           | 0.820 (0.781-0.862) | 0.840 (0.796-0.886) | 0.854 (0.809-0.902) |                     |
| <b>With chronic diseases</b>      |                     |                     |                     |                     |
| <b>Handgrip strength</b>          |                     |                     |                     |                     |

|                            |                     |                     |                     |
|----------------------------|---------------------|---------------------|---------------------|
| Per unit (kg)              | 1.032 (1.016-1.049) | 1.025 (1.006-1.044) | 1.024 (1.005-1.043) |
| Per SD                     | 1.412 (1.175-1.697) | 1.299 (1.052-1.604) | 1.287 (1.039-1.593) |
| Per 10%                    | 1.117 (1.052-1.186) | 1.081 (1.007-1.159) | 1.075 (1.001-1.155) |
| Time up and go test (TUGT) |                     |                     |                     |
| Per unit (s)               | 0.96 (0.945-0.977)  | 0.966 (0.949-0.983) | 0.969 (0.952-0.987) |
| Per SD                     | 0.629 (0.538-0.737) | 0.665 (0.565-0.781) | 0.695 (0.589-0.82)  |
| Per 10%                    | 0.823 (0.778-0.87)  | 0.842 (0.794-0.893) | 0.852 (0.803-0.904) |

---

Model A: Crude model

Model B: Adjusted for age, sex, nationality, educational level, occupation, and marital status

Model C: Adjusted for age, sex, nationality, educational level, occupation, marital status, smoking status, drinking status, BMI, and physical activity level

Model D: Adjusted for age, sex, nationality, educational level, occupation, marital status, smoking status, drinking status, BMI, physical activity level, CHD, stroke, and T2DM

TUGT, Time up and go test
